# Supplementary material for: Enhanced Fluctuations in Facial Pore Size, Redness, and TEWL Caused by Mask Usage Are Normalized by the Application of a Moisturizer
Source: J Clin Med. 2022 Apr 11;11(8):2121. doi: 10.3390/jcm11082121 (PMC9030563; doi:10.3390/jcm11082121)

## Supplementary Figure S1

Morning-to-evening fluctuation of skin hydration, TEWL, pore size, and redness. The pore size was significantly larger in the afternoon when the subjects wore their masks. A significant increase in TEWL was seen in the evening.

\*:  $P < 0.05$

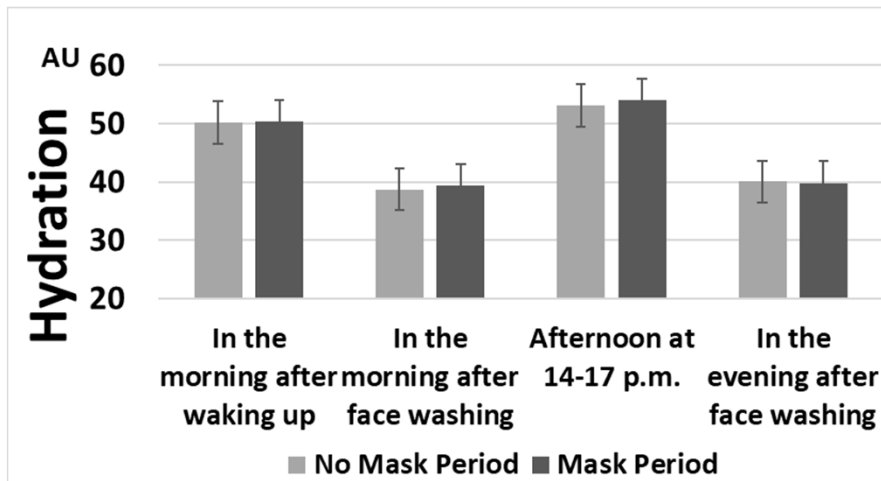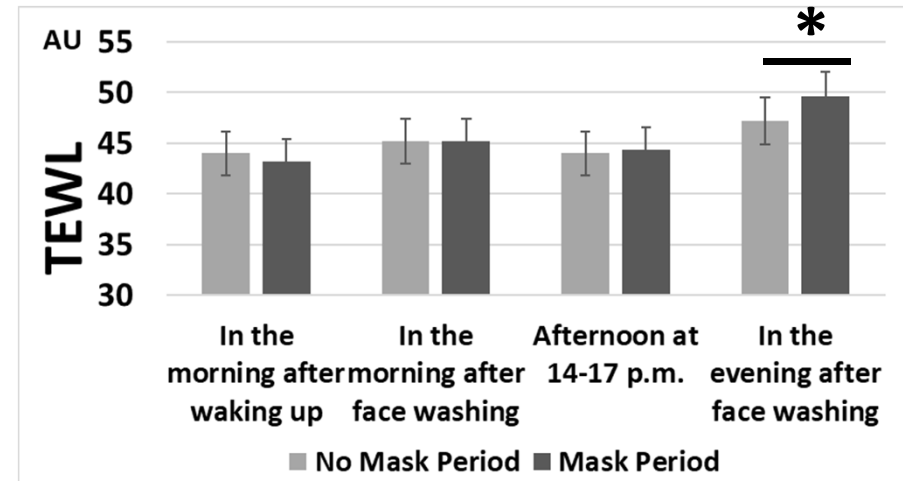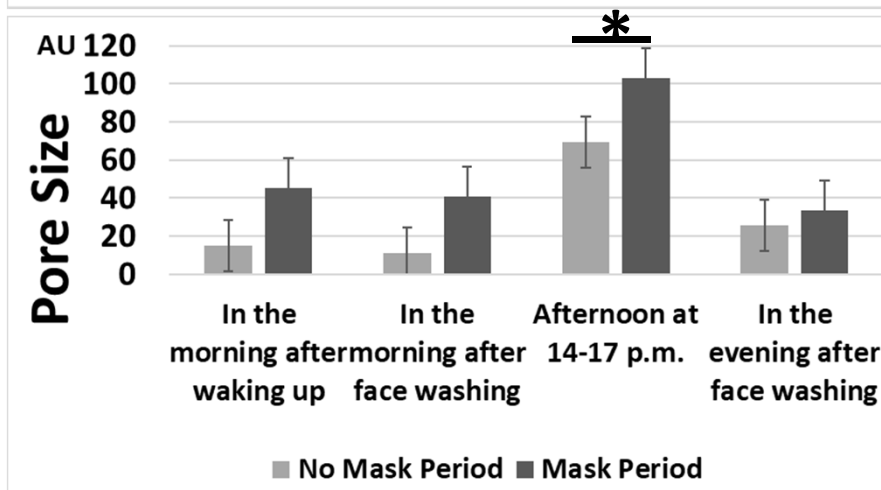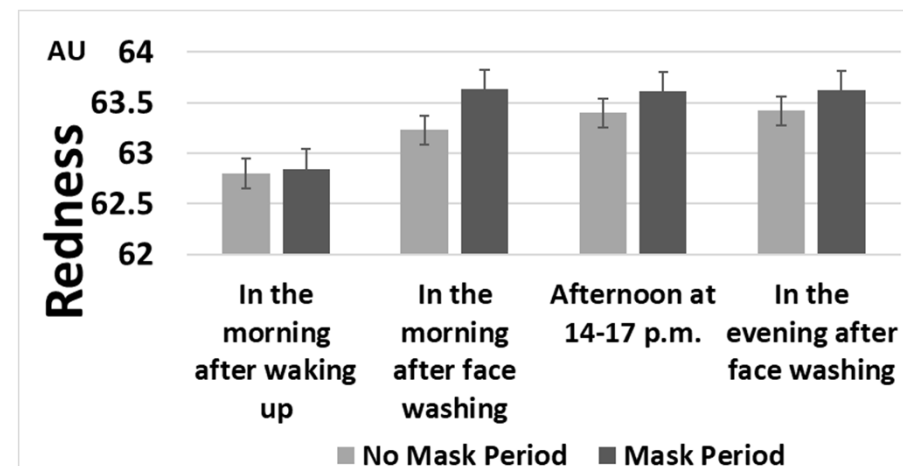

## Supplementary Figure S2

Skin parameters showed morning-to-evening fluctuation.

The intra-day  $\Delta$  fluctuation was calculated as  $|X2-X1| + |X2-X3| + |X4-X3|$ .

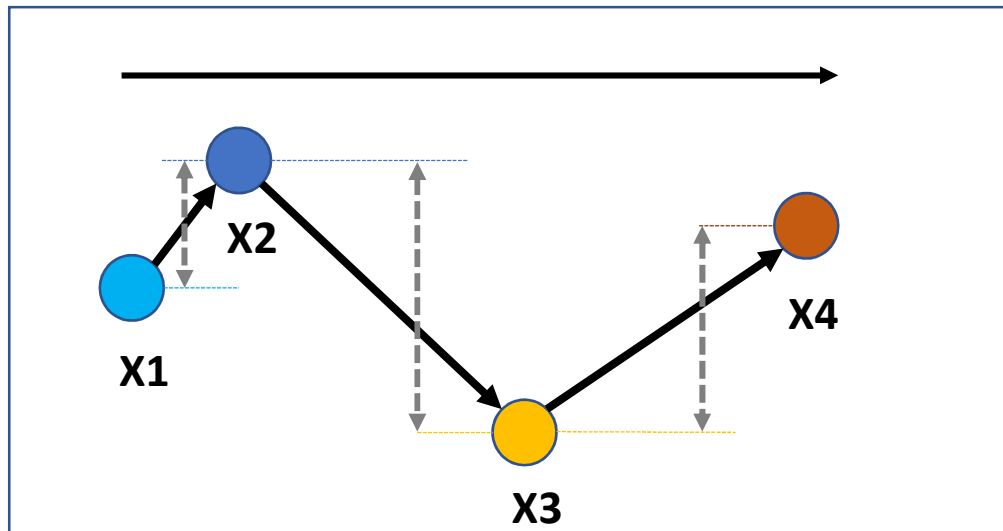

- X1: In the morning after waking up
- X2: In the morning after face washing
- X3: Afternoon at 14–17 p.m
- X4: In the evening after face washing

## Supplementary Figure S3

The intra-day  $\Delta$  fluctuation of pore size was significantly correlated with the intra-day  $\Delta$  fluctuation of redness.

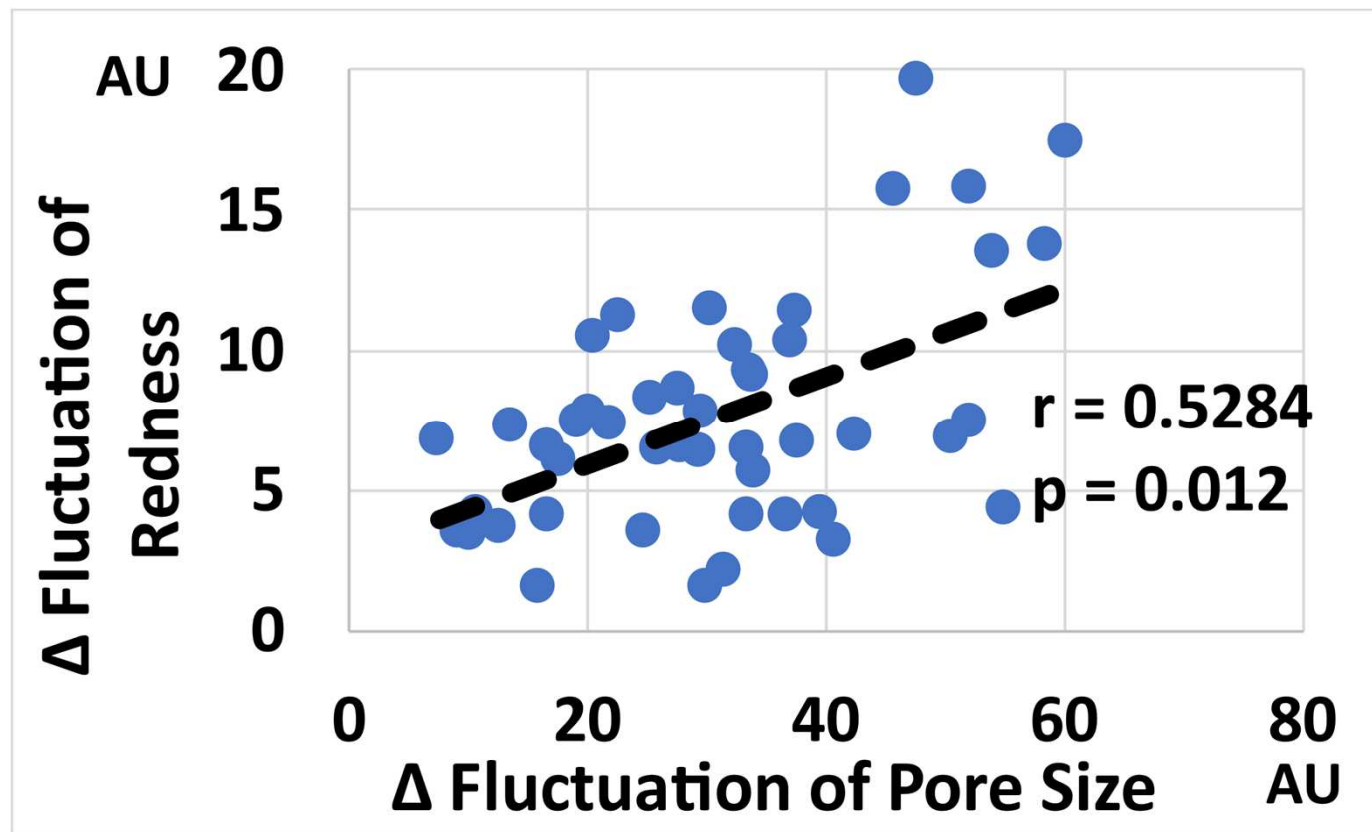

## Supplementary Figure S4

The intra-day averages of skin hydration and TEWL were significantly improved by treatment with a GFF-containing moisturizer.

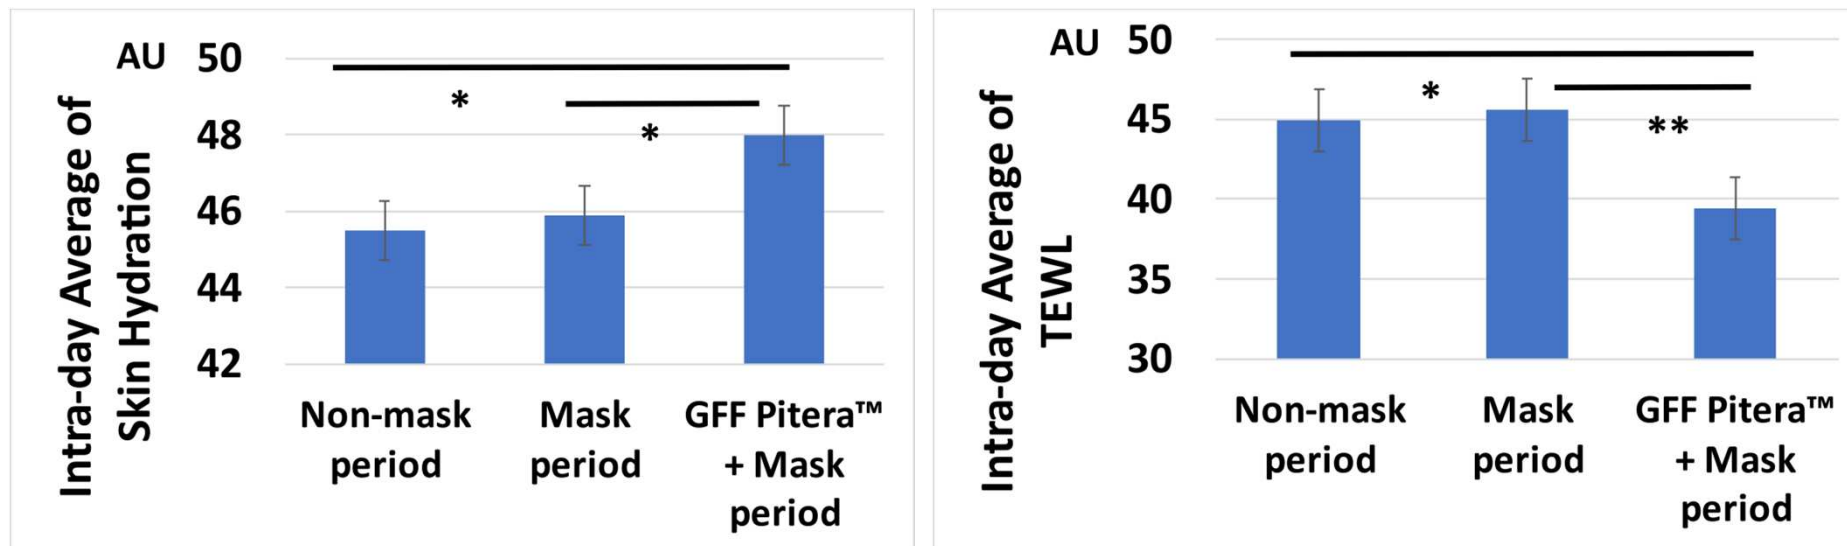

Supplement: Supplementary file 1 [file jcm-11-02121-s001.zip › jcm-1652690-SI.pdf]
